# Supplementary figures and images for: The Assessment of Muscle Mass and Function in Patients with Long-Standing Rheumatoid Arthritis
Source: MDPI journal article supplement (doi:10.3390/jcm10163458), 2021-08-04

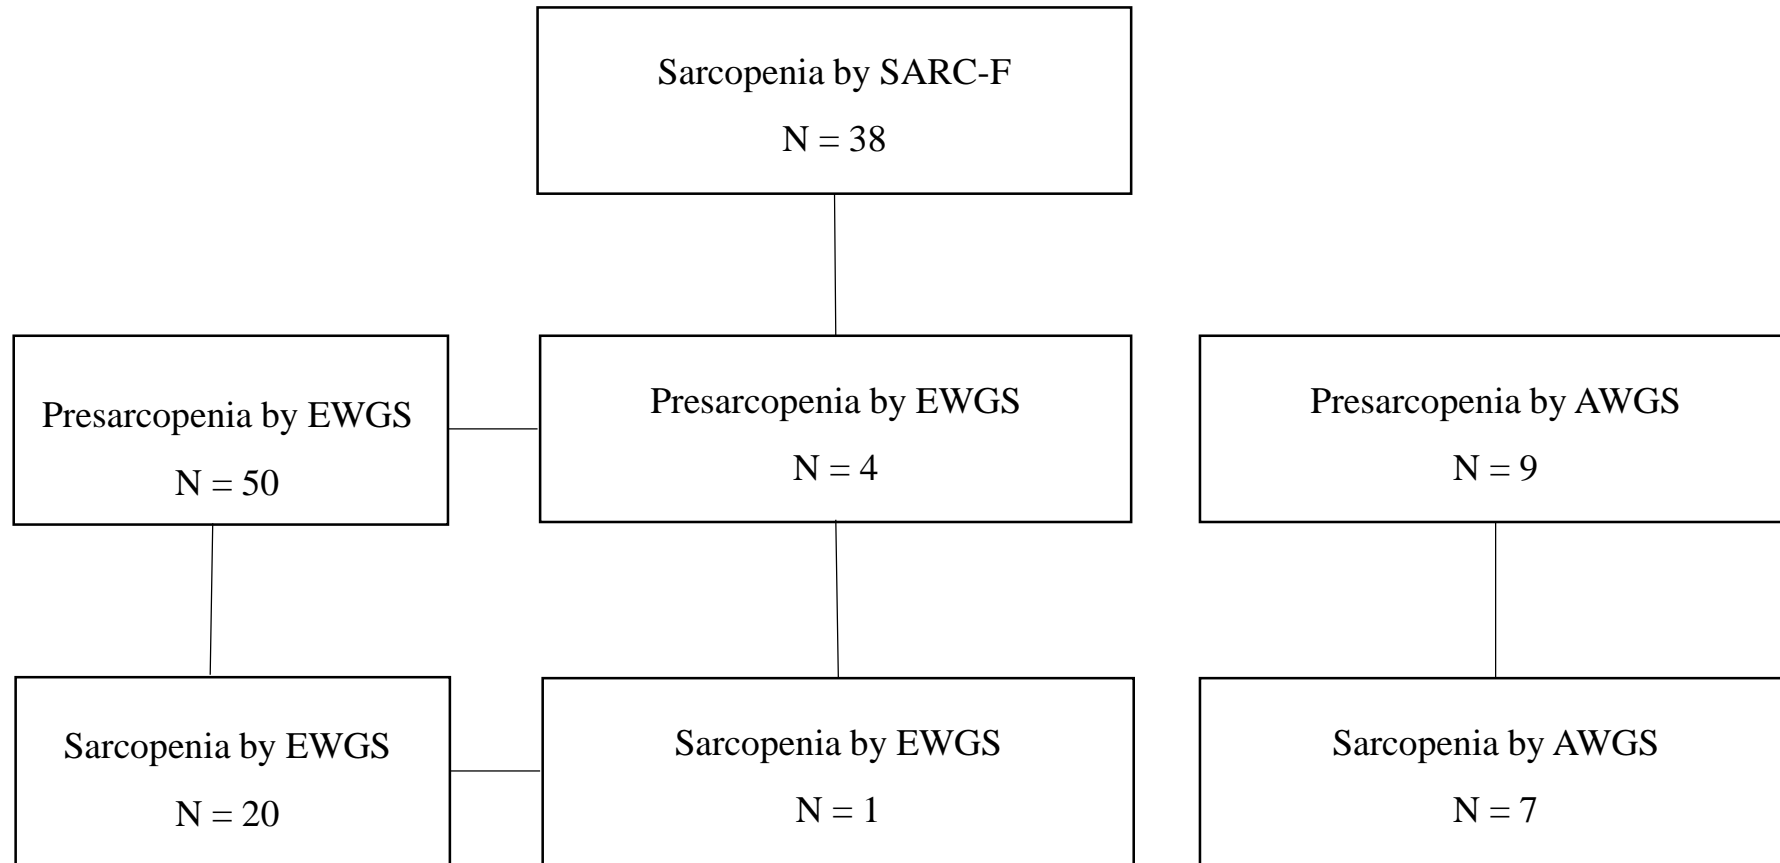

**Figure S1.** Flow diagram.

Supplement: s1 [file s1]
